# Supplementary material for: Longitudinal analysis of SARS-CoV-2 infection and vaccination in the LA-SPARTA cohort reveals increased risk of infection in vaccinated Hispanic participants
Source: PubMed Central journal article supplement (PMC10154521; doi:10.3389/fimmu.2023.1139915), 2023-04-19
Supplement: DataSheet_1.pdf [file DataSheet_1.pdf]

## *Supplementary Material*

# **Longitudinal analysis of SARS-CoV-2 infection and vaccination in the LA-SPARTA cohort reveals increased risk of infection in vaccinated Hispanic participants**

**Meagan M. Jenkins<sup>1</sup>, Donna Phan Tran<sup>2</sup>, Evelyn A. Flores<sup>2</sup>, Deborah Kupferwasser<sup>2</sup>, Harry Pickering<sup>1</sup>, Ying Zheng<sup>1</sup>, David W. Gjertson<sup>1,3</sup>, Ted M. Ross<sup>4,5</sup>, Joanna M. Schaeffer<sup>6,7†</sup>, Loren G. Miller<sup>2,6,8,7†</sup>, Michael R. Yeaman<sup>6,8-10†</sup>, Elaine F. Reed<sup>1\*†</sup>**

\* **Correspondence:** Elaine F. Reed: [ereed@mednet.ucla.edu](mailto:ereed@mednet.ucla.edu)

## **1 Supplementary Figures and Tables**

### **1.1 Supplementary Figures**

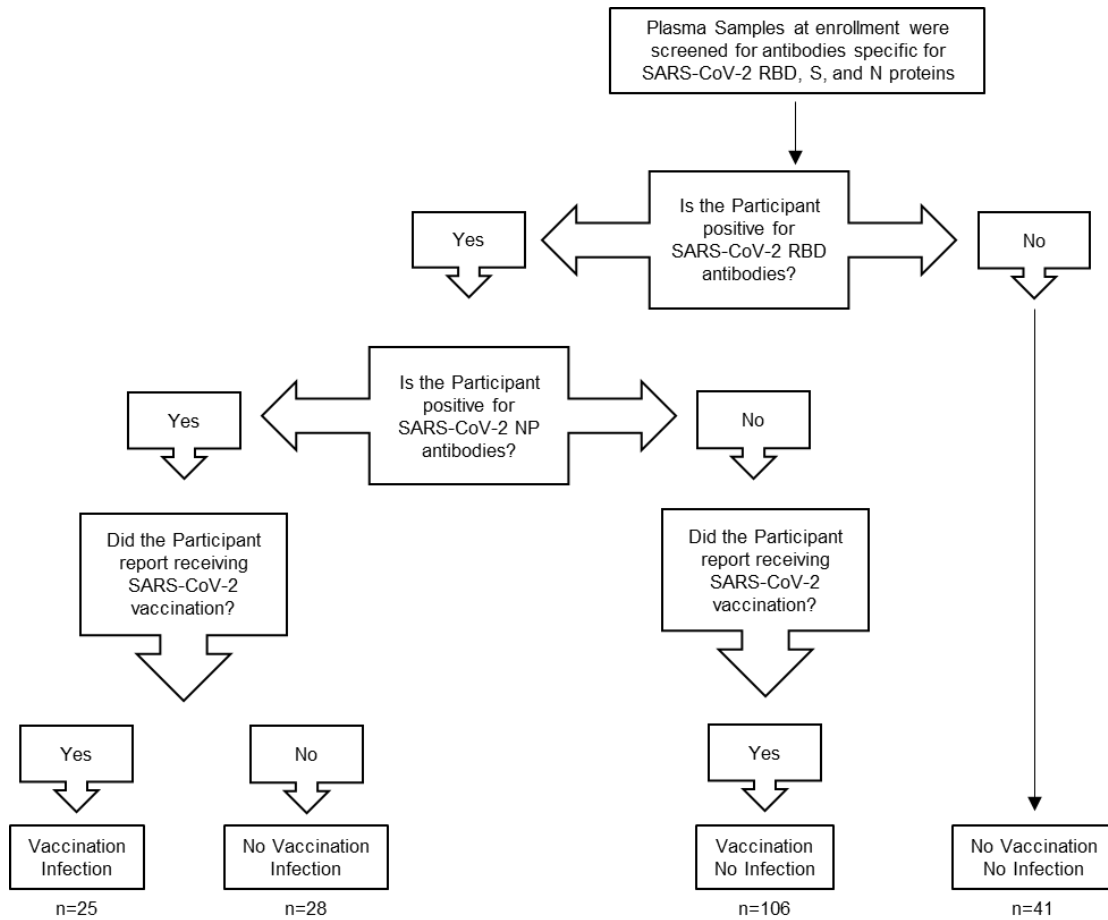

**Supplemental Figure 1. Flow Chart of participant grouping at enrollment based on serology.** The participant’s plasma was tested for anti-SARS-CoV-2 S, RBD, and NP antibodies, and grouped based on RBD and NP responses at enrollment. This flow chart outlines how the participants were grouped based on this.

Supplemental Figure 2

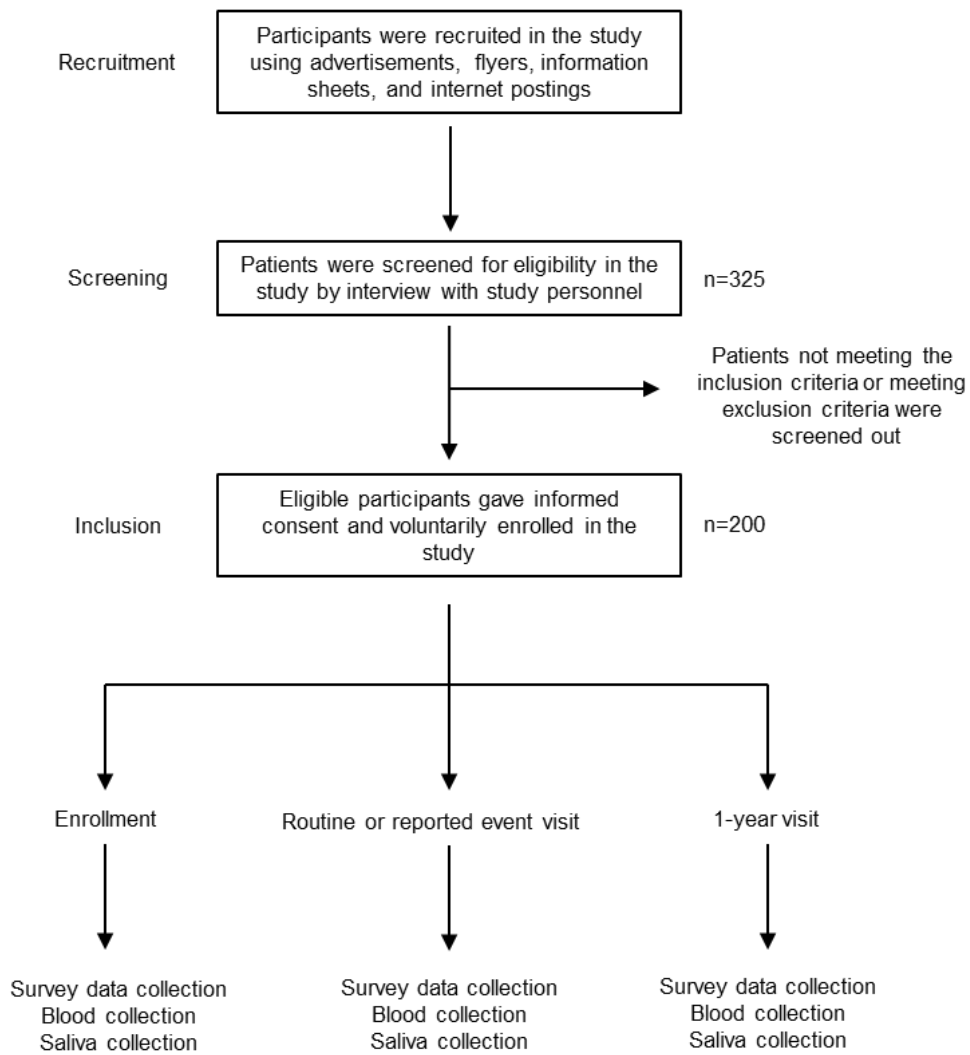

**Supplemental Figure 2. Study Design Flow Chart.** This figure shows the work flow of participant recruitment, screening, inclusion, enrollment, and sample collection.
